# Supplementary material for: Safety Following COVID-19 Booster Vaccine with BNT162b2 Compared to mRNA-1273 in Solid Cancer Patients Previously Vaccinated with ChAdOx1 or CoronaVac
Source: Vaccines (Basel). 2023 Feb 3;11(2):356. doi: 10.3390/vaccines11020356 (PMC9965854; doi:10.3390/vaccines11020356)
Supplement: Supplementary file 1 [file vaccines-11-00356-s001.zip › vaccines-2186032-supplementary.pdf]

## Supplementary material S1: Questionnaire

Volunteer number \_\_\_\_\_ Date of vaccination \_ \_ / \_ \_ / \_ \_ \_ \_ (Date/Month/Year)

Please placing check mark  $\checkmark$  in the box " that corresponds to your symptom after vaccination

### 1. Local reactions

|                                               | Date of onset                                                                                                                                                                                                                                    |                                                                                                                                                                                                                                                  |                                                                                                                                                                                                                                                  |                                                                                                                                                                                                                                                  |                                                                                                                                                                                                                                                  |                                                                                                                                                                                                                                                  |                                                                                                                                                                                                                                                  |                                                                                                                                                                                                                                                  |                                                                                                                                         |
|-----------------------------------------------|--------------------------------------------------------------------------------------------------------------------------------------------------------------------------------------------------------------------------------------------------|--------------------------------------------------------------------------------------------------------------------------------------------------------------------------------------------------------------------------------------------------|--------------------------------------------------------------------------------------------------------------------------------------------------------------------------------------------------------------------------------------------------|--------------------------------------------------------------------------------------------------------------------------------------------------------------------------------------------------------------------------------------------------|--------------------------------------------------------------------------------------------------------------------------------------------------------------------------------------------------------------------------------------------------|--------------------------------------------------------------------------------------------------------------------------------------------------------------------------------------------------------------------------------------------------|--------------------------------------------------------------------------------------------------------------------------------------------------------------------------------------------------------------------------------------------------|--------------------------------------------------------------------------------------------------------------------------------------------------------------------------------------------------------------------------------------------------|-----------------------------------------------------------------------------------------------------------------------------------------|
|                                               | Day 1                                                                                                                                                                                                                                            | Day 2                                                                                                                                                                                                                                            | Day 3                                                                                                                                                                                                                                            | Day 4                                                                                                                                                                                                                                            | Day 5                                                                                                                                                                                                                                            | Day 6                                                                                                                                                                                                                                            | Day 7                                                                                                                                                                                                                                            | After Day 7                                                                                                                                                                                                                                      |                                                                                                                                         |
| <b>Pain at the injection site</b>             | <input type="checkbox"/> No symptom<br><input type="checkbox"/> Mild<br><input type="checkbox"/> Moderate<br><input type="checkbox"/> Severe<br><input type="checkbox"/> ER visit/hospitalization                                                | <input type="checkbox"/> No symptom<br><input type="checkbox"/> Mild<br><input type="checkbox"/> Moderate<br><input type="checkbox"/> Severe<br><input type="checkbox"/> ER visit/hospitalization                                                | <input type="checkbox"/> No symptom<br><input type="checkbox"/> Mild<br><input type="checkbox"/> Moderate<br><input type="checkbox"/> Severe<br><input type="checkbox"/> ER visit/hospitalization                                                | <input type="checkbox"/> No symptom<br><input type="checkbox"/> Mild<br><input type="checkbox"/> Moderate<br><input type="checkbox"/> Severe<br><input type="checkbox"/> ER visit/hospitalization                                                | <input type="checkbox"/> No symptom<br><input type="checkbox"/> Mild<br><input type="checkbox"/> Moderate<br><input type="checkbox"/> Severe<br><input type="checkbox"/> ER visit/hospitalization                                                | <input type="checkbox"/> No symptom<br><input type="checkbox"/> Mild<br><input type="checkbox"/> Moderate<br><input type="checkbox"/> Severe<br><input type="checkbox"/> ER visit/hospitalization                                                | <input type="checkbox"/> No symptom<br><input type="checkbox"/> Mild<br><input type="checkbox"/> Moderate<br><input type="checkbox"/> Severe<br><input type="checkbox"/> ER visit/hospitalization                                                | <input type="checkbox"/> No symptom<br><input type="checkbox"/> Mild<br><input type="checkbox"/> Moderate<br><input type="checkbox"/> Severe<br><input type="checkbox"/> ER visit/hospitalization                                                | <input type="checkbox"/> Absence<br><input type="checkbox"/> Presence<br>If presence, date of symptom disappearance was _ _ / _ _ / _ _ |
| <b>Swelling at the injection site</b>         | <input type="checkbox"/> No symptom<br><input type="checkbox"/> Mild (2.5 - 5 cm.)<br><input type="checkbox"/> Moderate (5.1 - 10 cm.)<br><input type="checkbox"/> Severe (> 10 cm.)<br><input type="checkbox"/> Necrosis                        | <input type="checkbox"/> No symptom<br><input type="checkbox"/> Mild (2.5 - 5 cm.)<br><input type="checkbox"/> Moderate (5.1 - 10 cm.)<br><input type="checkbox"/> Severe (> 10 cm.)<br><input type="checkbox"/> Necrosis                        | <input type="checkbox"/> No symptom<br><input type="checkbox"/> Mild (2.5 - 5 cm.)<br><input type="checkbox"/> Moderate (5.1 - 10 cm.)<br><input type="checkbox"/> Severe (> 10 cm.)<br><input type="checkbox"/> Necrosis                        | <input type="checkbox"/> No symptom<br><input type="checkbox"/> Mild (2.5 - 5 cm.)<br><input type="checkbox"/> Moderate (5.1 - 10 cm.)<br><input type="checkbox"/> Severe (> 10 cm.)<br><input type="checkbox"/> Necrosis                        | <input type="checkbox"/> No symptom<br><input type="checkbox"/> Mild (2.5 - 5 cm.)<br><input type="checkbox"/> Moderate (5.1 - 10 cm.)<br><input type="checkbox"/> Severe (> 10 cm.)<br><input type="checkbox"/> Necrosis                        | <input type="checkbox"/> No symptom<br><input type="checkbox"/> Mild (2.5 - 5 cm.)<br><input type="checkbox"/> Moderate (5.1 - 10 cm.)<br><input type="checkbox"/> Severe (> 10 cm.)<br><input type="checkbox"/> Necrosis                        | <input type="checkbox"/> No symptom<br><input type="checkbox"/> Mild (2.5 - 5 cm.)<br><input type="checkbox"/> Moderate (5.1 - 10 cm.)<br><input type="checkbox"/> Severe (> 10 cm.)<br><input type="checkbox"/> Necrosis                        | <input type="checkbox"/> No symptom<br><input type="checkbox"/> Mild (2.5 - 5 cm.)<br><input type="checkbox"/> Moderate (5.1 - 10 cm.)<br><input type="checkbox"/> Severe (> 10 cm.)<br><input type="checkbox"/> Necrosis                        | <input type="checkbox"/> Absence<br><input type="checkbox"/> Presence<br>If presence, date of symptom disappearance was _ _ / _ _ / _ _ |
| <b>Erythema/Redness at the injection site</b> | <input type="checkbox"/> No symptom<br><input type="checkbox"/> Mild (2.5 - 5 cm.)<br><input type="checkbox"/> Moderate (5.1 - 10 cm.)<br><input type="checkbox"/> Severe (> 10 cm.)<br><input type="checkbox"/> Necrosis/exfoliative dermatitis | <input type="checkbox"/> No symptom<br><input type="checkbox"/> Mild (2.5 - 5 cm.)<br><input type="checkbox"/> Moderate (5.1 - 10 cm.)<br><input type="checkbox"/> Severe (> 10 cm.)<br><input type="checkbox"/> Necrosis/exfoliative dermatitis | <input type="checkbox"/> No symptom<br><input type="checkbox"/> Mild (2.5 - 5 cm.)<br><input type="checkbox"/> Moderate (5.1 - 10 cm.)<br><input type="checkbox"/> Severe (> 10 cm.)<br><input type="checkbox"/> Necrosis/exfoliative dermatitis | <input type="checkbox"/> No symptom<br><input type="checkbox"/> Mild (2.5 - 5 cm.)<br><input type="checkbox"/> Moderate (5.1 - 10 cm.)<br><input type="checkbox"/> Severe (> 10 cm.)<br><input type="checkbox"/> Necrosis/exfoliative dermatitis | <input type="checkbox"/> No symptom<br><input type="checkbox"/> Mild (2.5 - 5 cm.)<br><input type="checkbox"/> Moderate (5.1 - 10 cm.)<br><input type="checkbox"/> Severe (> 10 cm.)<br><input type="checkbox"/> Necrosis/exfoliative dermatitis | <input type="checkbox"/> No symptom<br><input type="checkbox"/> Mild (2.5 - 5 cm.)<br><input type="checkbox"/> Moderate (5.1 - 10 cm.)<br><input type="checkbox"/> Severe (> 10 cm.)<br><input type="checkbox"/> Necrosis/exfoliative dermatitis | <input type="checkbox"/> No symptom<br><input type="checkbox"/> Mild (2.5 - 5 cm.)<br><input type="checkbox"/> Moderate (5.1 - 10 cm.)<br><input type="checkbox"/> Severe (> 10 cm.)<br><input type="checkbox"/> Necrosis/exfoliative dermatitis | <input type="checkbox"/> No symptom<br><input type="checkbox"/> Mild (2.5 - 5 cm.)<br><input type="checkbox"/> Moderate (5.1 - 10 cm.)<br><input type="checkbox"/> Severe (> 10 cm.)<br><input type="checkbox"/> Necrosis/exfoliative dermatitis | <input type="checkbox"/> Absence<br><input type="checkbox"/> Presence<br>If presence, date of symptom disappearance was _ _ / _ _ / _ _ |

## 2. Systemic reactions

[illegible]





| Date of onset                                                  |                                                                                                                                                                                                                                                                                                                                        |                                                                                                                                                                                                                                                                                                                                           |                                                                                                                                                                                                                                                                                                                                           |                                                                                                                                                                                                                                                                                                                                           |                                                                                                                                                                                                                                                                                                                                        |                                                                                                                                                                                                                                                                                                                                        |                                                                                                                                                                                                                                                                                                                                           |                                                                                                                                           |
|----------------------------------------------------------------|----------------------------------------------------------------------------------------------------------------------------------------------------------------------------------------------------------------------------------------------------------------------------------------------------------------------------------------|-------------------------------------------------------------------------------------------------------------------------------------------------------------------------------------------------------------------------------------------------------------------------------------------------------------------------------------------|-------------------------------------------------------------------------------------------------------------------------------------------------------------------------------------------------------------------------------------------------------------------------------------------------------------------------------------------|-------------------------------------------------------------------------------------------------------------------------------------------------------------------------------------------------------------------------------------------------------------------------------------------------------------------------------------------|----------------------------------------------------------------------------------------------------------------------------------------------------------------------------------------------------------------------------------------------------------------------------------------------------------------------------------------|----------------------------------------------------------------------------------------------------------------------------------------------------------------------------------------------------------------------------------------------------------------------------------------------------------------------------------------|-------------------------------------------------------------------------------------------------------------------------------------------------------------------------------------------------------------------------------------------------------------------------------------------------------------------------------------------|-------------------------------------------------------------------------------------------------------------------------------------------|
|                                                                | Day 1                                                                                                                                                                                                                                                                                                                                  | Day 2                                                                                                                                                                                                                                                                                                                                     | Day 3                                                                                                                                                                                                                                                                                                                                     | Day 4                                                                                                                                                                                                                                                                                                                                     | Day 5                                                                                                                                                                                                                                                                                                                                  | Day 6                                                                                                                                                                                                                                                                                                                                  | Day 7                                                                                                                                                                                                                                                                                                                                     | After Day 7                                                                                                                               |
|                                                                | (ER visit/<br>hospitalization)                                                                                                                                                                                                                                                                                                         | (ER visit/<br>hospitalization)                                                                                                                                                                                                                                                                                                            | (ER visit/<br>hospitalization)                                                                                                                                                                                                                                                                                                            | (ER visit/<br>hospitalization)                                                                                                                                                                                                                                                                                                            | (ER visit/<br>hospitalization)                                                                                                                                                                                                                                                                                                         | (ER visit/<br>hospitalization)                                                                                                                                                                                                                                                                                                         | (ER visit/<br>hospitalization)                                                                                                                                                                                                                                                                                                            |                                                                                                                                           |
| Lump/<br>swollen<br>at<br>axillary<br>/other<br>lymph<br>nodes | <input type="checkbox"/> No symptom<br><input type="checkbox"/> Mild<br>(No interference<br>with activity)<br><input type="checkbox"/> Moderate<br>(Some interference<br>with activity)<br><input type="checkbox"/> Severe<br>(Prevents daily activity)<br><input type="checkbox"/> Life threatening<br>(ER visit/<br>hospitalization) | <input type="checkbox"/> No symptom<br><input type="checkbox"/> Mild<br>(No interference<br>with activity)<br><input type="checkbox"/> Moderate<br>(Some interference<br>with activity)<br><input type="checkbox"/> Severe<br>(Prevents daily<br>activity)<br><input type="checkbox"/> Life threatening<br>(ER visit/<br>hospitalization) | <input type="checkbox"/> No symptom<br><input type="checkbox"/> Mild<br>(No interference<br>with activity)<br><input type="checkbox"/> Moderate<br>(Some interference<br>with activity)<br><input type="checkbox"/> Severe<br>(Prevents daily<br>activity)<br><input type="checkbox"/> Life threatening<br>(ER visit/<br>hospitalization) | <input type="checkbox"/> No symptom<br><input type="checkbox"/> Mild<br>(No interference<br>with activity)<br><input type="checkbox"/> Moderate<br>(Some interference<br>with activity)<br><input type="checkbox"/> Severe<br>(Prevents daily<br>activity)<br><input type="checkbox"/> Life threatening<br>(ER visit/<br>hospitalization) | <input type="checkbox"/> No symptom<br><input type="checkbox"/> Mild<br>(No interference<br>with activity)<br><input type="checkbox"/> Moderate<br>(Some interference<br>with activity)<br><input type="checkbox"/> Severe<br>(Prevents daily activity)<br><input type="checkbox"/> Life threatening<br>(ER visit/<br>hospitalization) | <input type="checkbox"/> No symptom<br><input type="checkbox"/> Mild<br>(No interference<br>with activity)<br><input type="checkbox"/> Moderate<br>(Some interference<br>with activity)<br><input type="checkbox"/> Severe<br>(Prevents daily activity)<br><input type="checkbox"/> Life threatening<br>(ER visit/<br>hospitalization) | <input type="checkbox"/> No symptom<br><input type="checkbox"/> Mild<br>(No interference<br>with activity)<br><input type="checkbox"/> Moderate<br>(Some interference<br>with activity)<br><input type="checkbox"/> Severe<br>(Prevents daily<br>activity)<br><input type="checkbox"/> Life threatening<br>(ER visit/<br>hospitalization) | <input type="checkbox"/> Absence<br><input type="checkbox"/> Presence<br>If presence, date<br>of symptom<br>disappearance<br>was __/__/__ |
| Other<br>symptom<br>specify<br>.....<br>.....<br>.....         | <input type="checkbox"/> No symptom<br><input type="checkbox"/> Mild<br>(No interference<br>with activity)<br><input type="checkbox"/> Moderate<br>(Some interference<br>with activity)<br><input type="checkbox"/> Severe<br>(Prevents daily activity)<br><input type="checkbox"/> Life threatening<br>(ER visit/<br>hospitalization) | <input type="checkbox"/> No symptom<br><input type="checkbox"/> Mild<br>(No interference<br>with activity)<br><input type="checkbox"/> Moderate<br>(Some interference<br>with activity)<br><input type="checkbox"/> Severe<br>(Prevents daily<br>activity)<br><input type="checkbox"/> Life threatening<br>(ER visit/<br>hospitalization) | <input type="checkbox"/> No symptom<br><input type="checkbox"/> Mild<br>(No interference<br>with activity)<br><input type="checkbox"/> Moderate<br>(Some interference<br>with activity)<br><input type="checkbox"/> Severe<br>(Prevents daily<br>activity)<br><input type="checkbox"/> Life threatening<br>(ER visit/<br>hospitalization) | <input type="checkbox"/> No symptom<br><input type="checkbox"/> Mild<br>(No interference<br>with activity)<br><input type="checkbox"/> Moderate<br>(Some interference<br>with activity)<br><input type="checkbox"/> Severe<br>(Prevents daily<br>activity)<br><input type="checkbox"/> Life threatening<br>(ER visit/<br>hospitalization) | <input type="checkbox"/> No symptom<br><input type="checkbox"/> Mild<br>(No interference<br>with activity)<br><input type="checkbox"/> Moderate<br>(Some interference<br>with activity)<br><input type="checkbox"/> Severe<br>(Prevents daily activity)<br><input type="checkbox"/> Life threatening<br>(ER visit/<br>hospitalization) | <input type="checkbox"/> No symptom<br><input type="checkbox"/> Mild<br>(No interference<br>with activity)<br><input type="checkbox"/> Moderate<br>(Some interference<br>with activity)<br><input type="checkbox"/> Severe<br>(Prevents daily activity)<br><input type="checkbox"/> Life threatening<br>(ER visit/<br>hospitalization) | <input type="checkbox"/> No symptom<br><input type="checkbox"/> Mild<br>(No interference<br>with activity)<br><input type="checkbox"/> Moderate<br>(Some interference<br>with activity)<br><input type="checkbox"/> Severe<br>(Prevents daily<br>activity)<br><input type="checkbox"/> Life threatening<br>(ER visit/<br>hospitalization) | <input type="checkbox"/> Absence<br><input type="checkbox"/> Presence<br>If presence, date<br>of symptom<br>disappearance<br>was __/__/__ |
